# Supplementary material
Source: PubMed Central journal article supplement (PMC9839346)
Supplement: NIHMS1850634-supplement-1.pdf [file NIHMS1850634-supplement-1.pdf]

**SUPPLEMENTAL TABLES:****Supplemental Table 1: Distribution of disease volume by BMI group**

|                   | Underweight/Normal (BMI <25) |         | Overweight (25≤BMI<30) |         | Obesity (BMI ≥30) |         |
|-------------------|------------------------------|---------|------------------------|---------|-------------------|---------|
|                   | N                            | Percent | N                      | Percent | N                 | Percent |
| Extent of Disease |                              |         |                        |         |                   |         |
| High              | 104                          | 78.8%   | 221                    | 66.8%   | 186               | 57.4%   |
| Low               | 28                           | 21.2%   | 110                    | 33.2%   | 138               | 42.6%   |
| Total             | 132                          |         | 331                    |         | 324               |         |

\*Baseline BMI is significantly associated with disease volume ( $p < .0001$  by Fisher's exact test).

**Supplemental Table 2: Cox regression model<sup>1</sup> for time to CRPC**

| Variable            | UVA (n=788 <sup>2</sup> ) |              |         | MVA <sup>3</sup> (n=788 <sup>2</sup> ) |              |         |
|---------------------|---------------------------|--------------|---------|----------------------------------------|--------------|---------|
|                     | HR                        | 95% CI       | p-value | HR                                     | 95% CI       | p-value |
| Treatment arm       |                           |              |         |                                        |              |         |
| ADT alone           | 1.00                      | -            |         | 1.00                                   | -            |         |
| ADT + D             | 0.61                      | (0.52, 0.73) | <.0001  | 0.60                                   | (0.50, 0.71) | <.0001  |
| Metformin use       |                           |              |         |                                        |              |         |
| No                  | 1.00                      | -            |         | 1.00                                   | -            |         |
| Yes                 | 0.87                      | (0.64, 1.18) | 0.37    | 1.02                                   | (0.75, 1.39) | 0.91    |
| Volume of disease   |                           |              |         |                                        |              |         |
| Low                 | 1.00                      | -            |         | 1.00                                   | -            |         |
| High                | 2.20                      | (1.80, 2.68) | <.0001  | 1.93                                   | (1.57, 2.38) | <.0001  |
| ECOG PS             |                           |              |         |                                        |              |         |
| 0                   | 1.00                      | -            |         | -                                      | -            | -       |
| 1-2                 | 1.15                      | (0.95, 1.39) | 0.15    | -                                      | -            | -       |
| Gleason score       |                           |              |         |                                        |              |         |
| ≤7                  | 1.00                      | -            |         | 1.00                                   | -            |         |
| 8-10                | 1.52                      | (1.23, 1.87) | <.0001  | 1.30                                   | (1.04, 1.62) | 0.02    |
| Missing/Unknown     | 1.55                      | (1.13, 2.13) | 0.007   | 1.17                                   | (0.84, 1.63) | 0.35    |
| Prior local therapy |                           |              |         |                                        |              |         |
| No                  | 1.00                      | -            |         | 1.00                                   | -            |         |
| Yes                 | 0.58                      | (0.47, 0.73) | <.0001  | 0.64                                   | (0.50, 0.83) | 0.0007  |
| Baseline PSA        |                           |              |         |                                        |              |         |
| <65                 | 1.00                      | -            |         | 1.00                                   | -            |         |
| ≥65                 | 1.46                      | (1.22, 1.75) | <.0001  | 1.27                                   | (1.05, 1.54) | 0.01    |
| BMI                 |                           |              |         |                                        |              |         |
| <25                 | 1.00                      | -            |         | -                                      | -            | -       |
| 25-29.9             | 0.86                      | (0.67, 1.10) | 0.22    | -                                      | -            | -       |
| ≥30                 | 0.89                      | (0.69, 1.14) | 0.34    | -                                      | -            | -       |

1. stratified by stratification factors at randomization, including age, ECOG PS, CAB use, duration of prior adjuvant hormonal therapy, use of FDA approved drugs for delaying skeletal related events and volume of disease; treatment arm by metformin use interaction was not statistically significant (p=0.42)
2. only patients with metformin data were included in the analysis
3. variables with p<0.10 in the univariable analysis were included in the multivariable analysis; metformin was forced into the multivariable model regardless of significance.
